# Supplementary material
Source: PubMed Central journal article supplement (PMC9112889)
Supplement: aac.02250-21-s0001.pdf [file aac.02250-21-s0001.pdf]

## Supplemental Figures

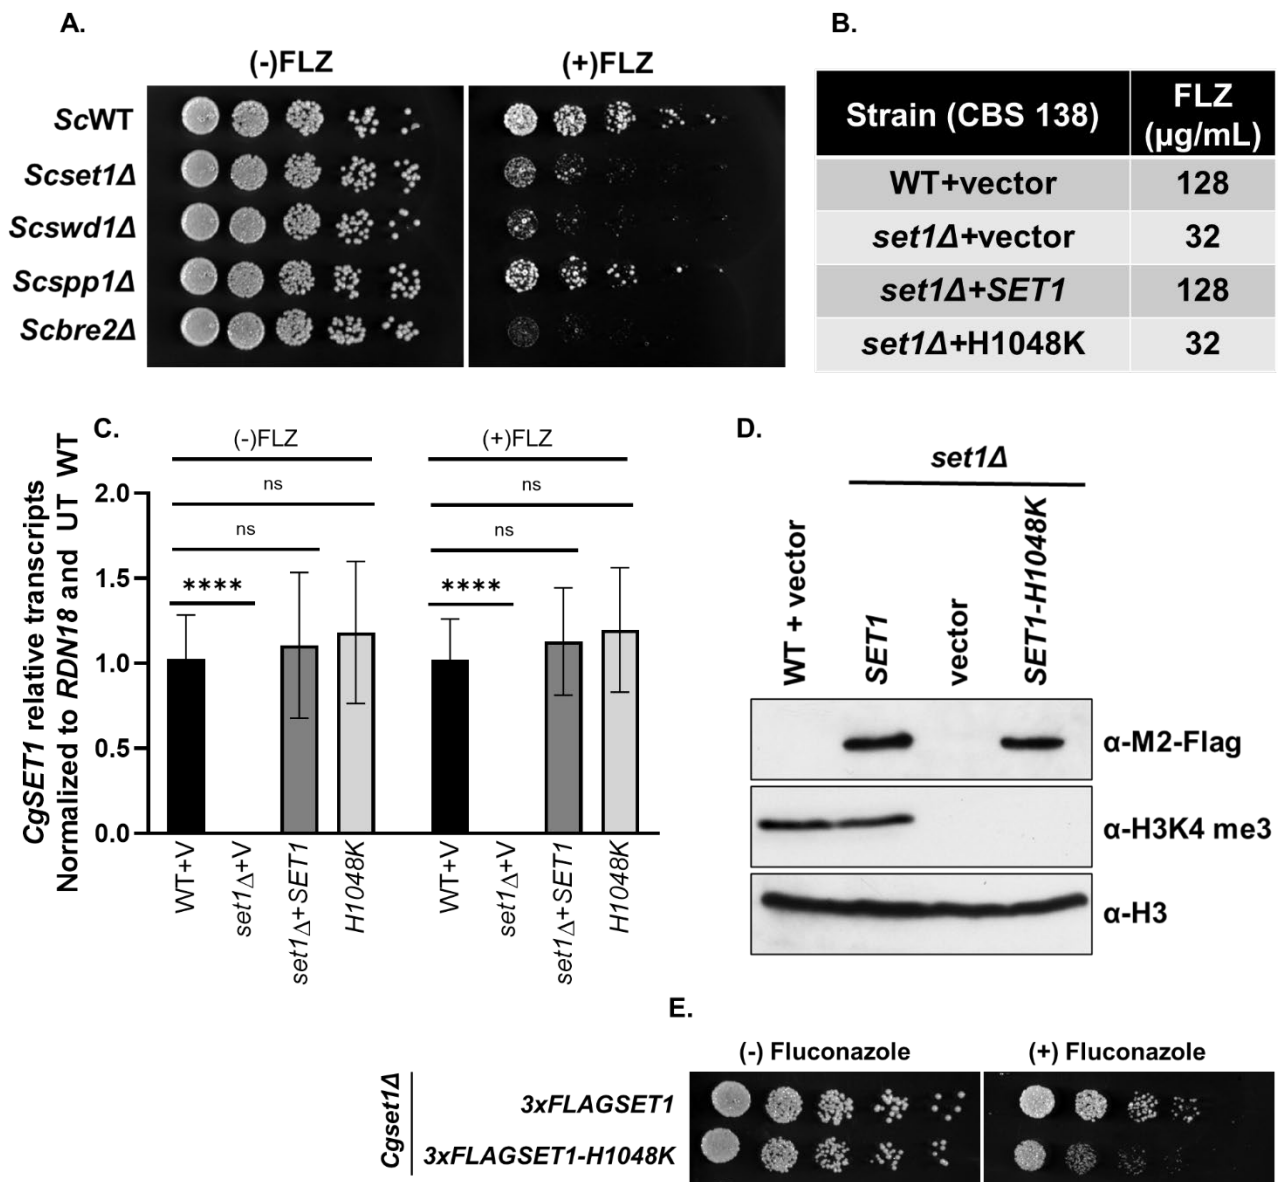

**FIG S1.** Loss of Set1 complex members results in altered azole efficacy. (A) Five-fold serial dilution spot assays of the indicated *S. cerevisiae* strains were grown on SC plates with or without 8 μg/mL fluconazole. (B) MIC assay of the indicated strains performed in SC media at 35°C and results recorded after 24 h of incubation. (C) Expression of SET1 was determined in the indicated mutants treated with and without 64 μg/mL fluconazole for 3 h by qRT-PCR analysis. Gene expression analysis was set relative to the untreated wild-type and expression was normalized to *RDN18* mRNA levels. Data were analyzed from 4 biological replicates with three technical replicates each. (D) Whole cell extracts isolated from the indicated strains were immunoblotted using trimethyl-specific and anti-M2-Flag mouse antibodies. Histone H3 was used as a loading control. (E) Five-fold serial dilution spot assays of the indicated 3xFLAG-*SET1* strains were grown on SC plates with or without 32 μg/mL fluconazole. Statistics were performed using Graphpad Prism student t-test version 9.2.0. \*\*\*\* $p < 0.0001$ . Error bars represent SD.

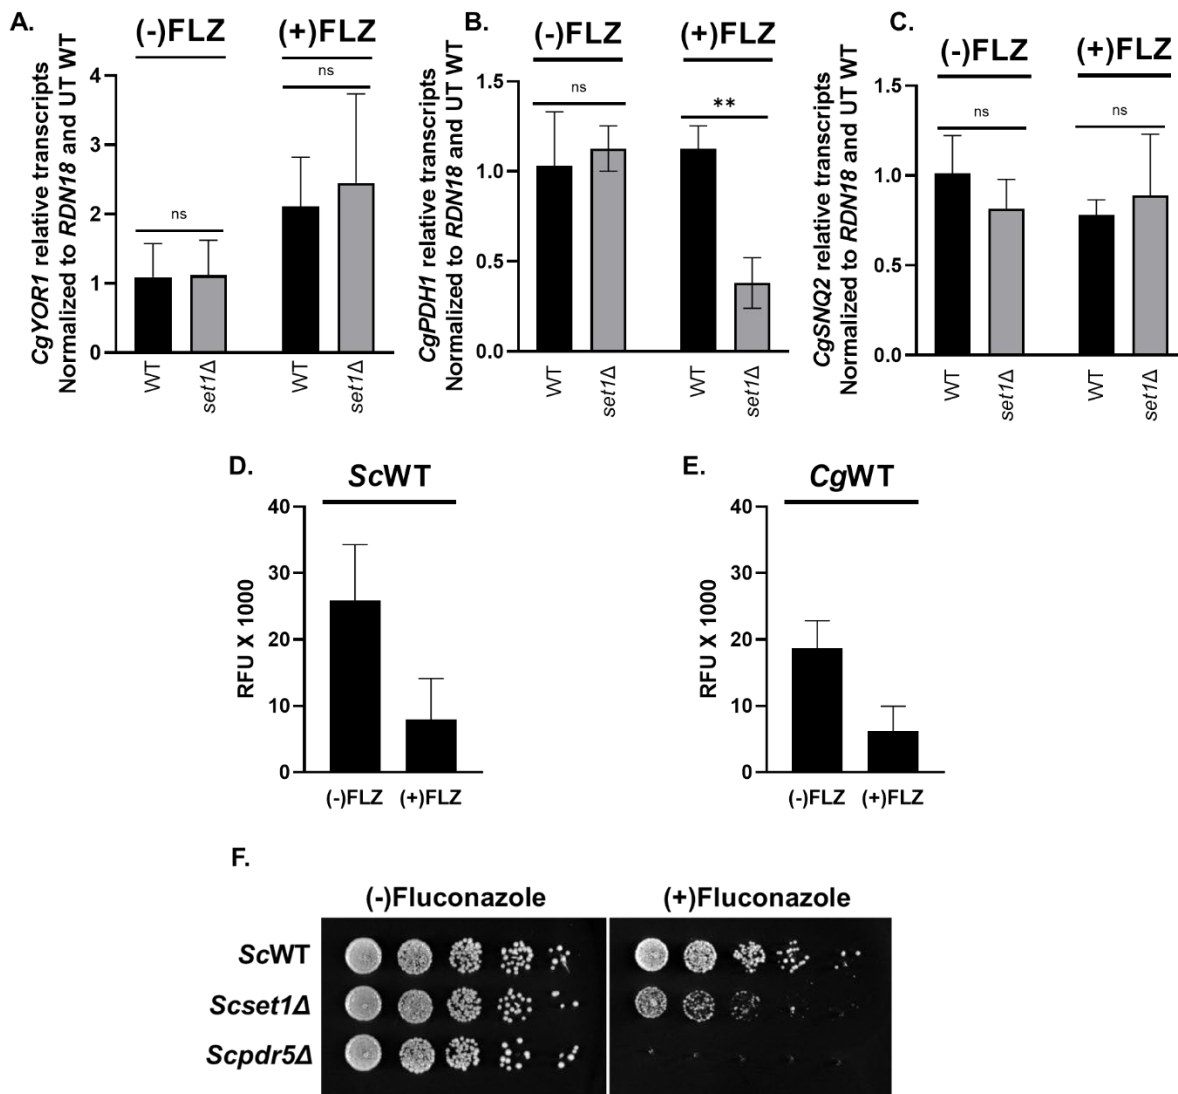

**Fig S2.** Transcript levels of drug transporters in a *set1Δ* strain compared to wild type. (A-C) Expression of the indicated genes were determined in the indicated mutants treated with and without 64  $\mu$ M fluconazole for 3 h by qRT-PCR analysis. Gene expression analysis was set relative to the untreated wild-type and expression was normalized to *RDN18* mRNA levels. Data were analyzed from  $\geq 3$  biological replicates with three technical replicates each. Statistics were performed using Graphpad Prism student t-test version 9.2.0.  $**p < 0.01$ . Error bars represent SD. (D-E) Relative fluorescent units of Nile red in wild-type *C. glabrata* and *S. cerevisiae* with and without 64  $\mu$ M fluconazole. (F) Five-fold dilution spot assay of indicated *S. cerevisiae* strains with and without 8  $\mu$ M fluconazole on minimal media.

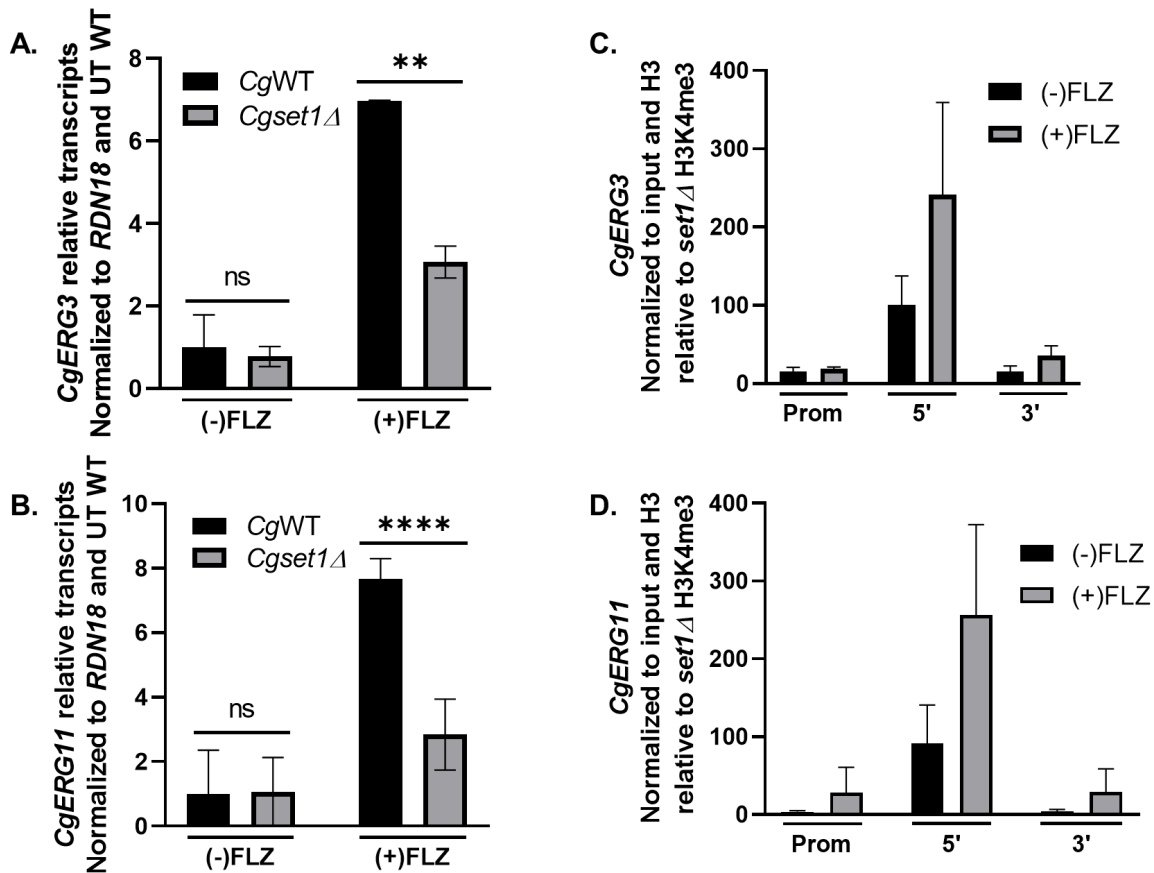

**Fig S3.** Histone H3K4 trimethylation is enriched on ERG gene chromatin and Set1-mediated histone H3K4 methyltransferase activity is required for azole induction of ERG genes in saturated cells. (A, B) Expression of genes was determined in the indicated strains treated with and without 64  $\mu\text{g}/\text{mL}$  fluconazole in a saturated culture for 3 h by qRT-PCR analysis. Gene expression analysis was set relative to the untreated wild-type expression was normalized to *RDN18* mRNA levels. Data were analyzed from  $\geq 3$  biological replicates with three technical replicates each. (C, D) ChIP analysis of histone H3K4 tri-methylation levels at the promoter, 5', and 3' regions of *ERG11* and *ERG3* in a wild-type *C. glabrata* strain with and without 64  $\mu\text{g}/\text{mL}$  fluconazole treatment in saturated cell cultures. ChIP analysis was set relative to a *set1* $\Delta$  strain and normalized to histone H3 and DNA input levels. Data were analyzed from 3 biological replicates with three technical replicates each. Statistics were performed using Graphpad Prism student t-test version 9.2.0. \*\*\*\* $p < 0.0001$  and \*\* $p < 0.01$ . Error bars represent SD.

A.

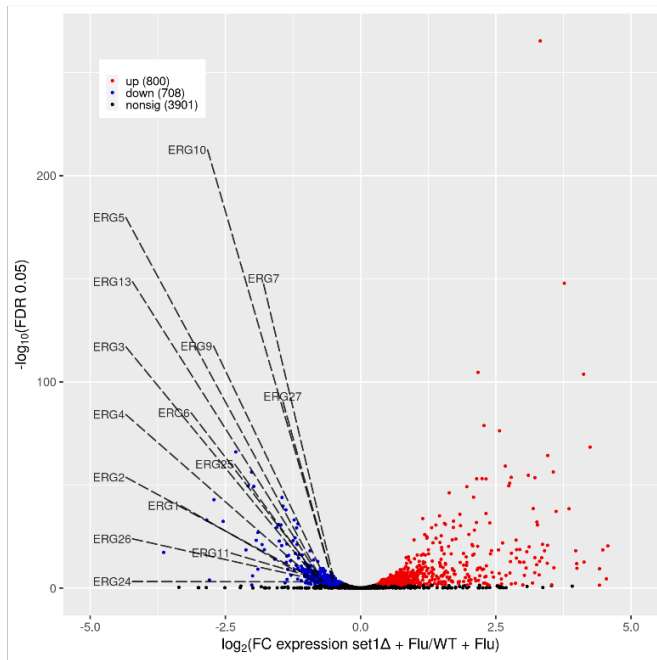

B.

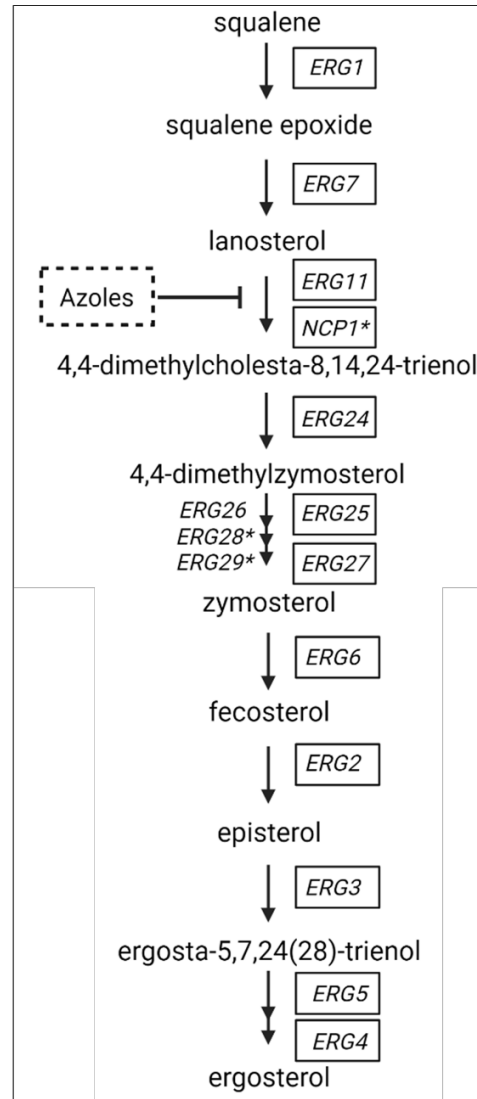

**Fig S4.** Genes encoding enzymes of the late ergosterol pathway are down in a *set1Δ* strain upon azole treatment in *C. glabrata*. (A) Volcano plot showing the significance [ $-\log_2(\text{FDR})$ , y-axis] vs. the fold change (x-axis) of the DEGs identified in the *set1Δ* azole treated samples relative to WT azole treated samples. Genes with significant differential expression ( $\text{FDR} < 0.05$ ) are highlighted in red or blue for up- and downregulated genes, respectively. Down-regulated *ERG* genes are labelled in the plot which include 12 of the *ERG* genes in the late pathway and two *ERG* genes in the early pathway. Black highlighted genes are considered nonsignificant. (B) Depiction of the late ergosterol pathway in *C. glabrata*. Azoles inhibit lanosterol 14- $\alpha$ -demethylase, the enzyme encoded by *ERG11*. *NCP1\** and *ERG28\** interact with ergosterol synthesizing enzymes. *ERG29\** is a protein of unknown function involved in ergosterol biosynthesis. Loss of *SET1* results in lower transcript levels of 12 of the 12 genes in the late ergosterol biosynthesis pathway compared to a wild-type strain upon azole treatment. Genes with decreased transcript levels due the loss of *SET1* are surrounded by a solid square.

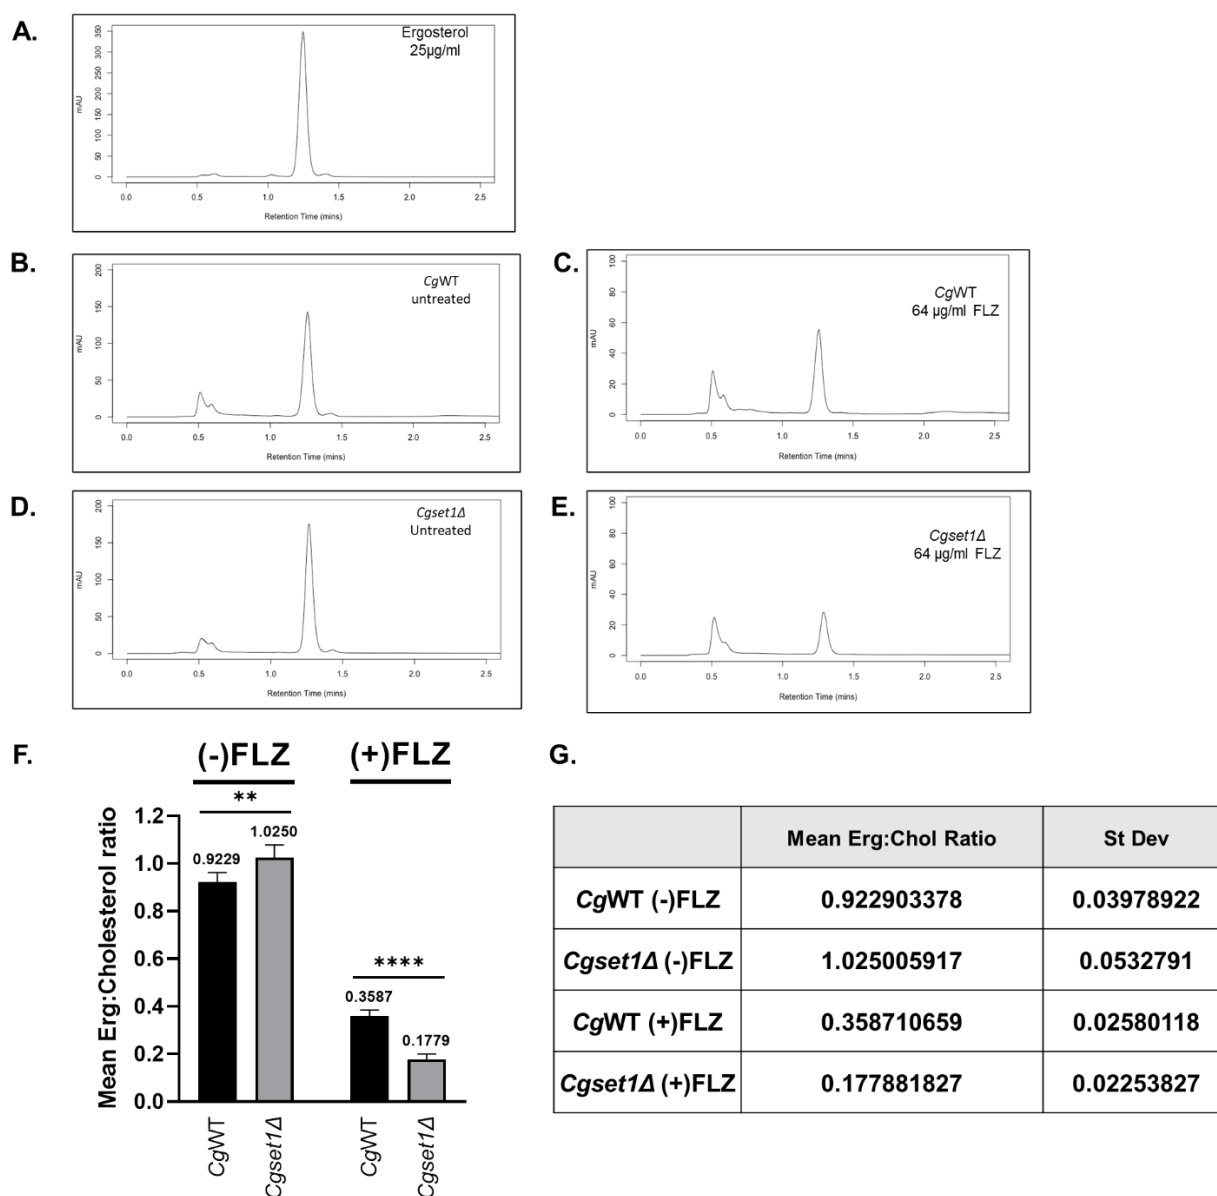

**Fig. S5 HPLC analysis of total cellular ergosterol.** (A-E) Representative chromatograms of ergosterol extracted from CgWT and Cgset1Δ cells with and without 64 µg/mL fluconazole treatment compared with purified ergosterol (MilliporeSigma). Purified and extracted ergosterol had a retention time of ~1.2 min. Purified cholesterol (MilliporeSigma) was added to the extract yeast as an internal control (data not shown). Standard curves were generated for ergosterol and cholesterol to determine the ergosterol:cholesterol ratio (F) Bar graph and mean ergosterol:cholesterol ratio of the indicated *C. glabrata* strains treated with and without 64 µg/mL fluconazole. (G) Table of values used to generate Figure S5F and Figure 7. Data was obtained from 6 biological replicates.

## Supplemental Tables

| Table S1.                      | Yeast Strains                                                                                  |                                                 |                      |
|--------------------------------|------------------------------------------------------------------------------------------------|-------------------------------------------------|----------------------|
| Strains                        | Genotype                                                                                       | Reference                                       | Strain Name          |
| <i>S. cerevisiae</i><br>BY4741 | <i>MATα his3Δ leu2Δ0 LYS2 met15Δ0<br/>ura3Δ0</i>                                               | Open Biosystems                                 | ScWT                 |
| <i>Scswd1Δ</i>                 | <i>MATα his3Δ leu2Δ0 LYS2 met15Δ0<br/>ura3Δ0 swd1Δ::KanMX</i>                                  | Open Biosystems                                 | <i>Scswd1Δ</i>       |
| <i>Scspp1Δ</i>                 | <i>MATα his3Δ leu2Δ0 LYS2 met15Δ0<br/>ura3Δ0 spp1Δ::KanMX</i>                                  | Open Biosystems                                 | <i>Scspp1Δ</i>       |
| <i>Scbre2Δ</i>                 | <i>MATα his3Δ leu2Δ0 LYS2 met15Δ0<br/>ura3Δ0 bre2Δ::KanMX</i>                                  | Open Biosystems                                 | <i>Scbre2Δ</i>       |
| SDBY1420                       | <i>MATα his3Δ leu2Δ0 LYS2 met15Δ0<br/>ura3Δ0 set1Δ::HphMX</i>                                  | Zhang et al. Yeast<br>2017                      | <i>Scset1Δ</i>       |
| SDBY1600                       | <i>MATα his3Δ leu2Δ0 LYS2 met15Δ0<br/>ura3Δ0 HHT1::K4R</i>                                     | This study                                      | <i>ScH3K4R1</i>      |
| SDBY1601                       | <i>MATα his3Δ leu2Δ0 LYS2<br/>met15Δ0ura3Δ0 HHT1::K4R<br/>HHT2::K4R</i>                        | This study                                      | <i>ScH3K4R2</i>      |
| <i>Scpdr5Δ</i>                 | <i>MATα his3Δ leu2Δ0 LYS2 met15Δ0<br/>ura3Δ0 pdr5Δ::KanMX</i>                                  | Open Biosystems                                 | <i>Scpdr5Δ</i>       |
| ATCC 2001<br>CgWT              | <i>C. glabrata</i> wild type strain                                                            | <a href="http://www.atcc.org">www.atcc.org</a>  | CgWT                 |
| SDBY1602                       | <i>set1Δ::HphMX</i>                                                                            | This study                                      | <i>Cgset1Δ</i>       |
| SDBY1603                       | <i>swd1Δ::HphMX</i>                                                                            | This study                                      | <i>Cgswd1Δ</i>       |
| SDBY1604                       | <i>spp1Δ::HphMX</i>                                                                            | This study                                      | <i>Cgspp1Δ</i>       |
| SDBY1605                       | <i>bre2Δ::HphMX</i>                                                                            | This study                                      | <i>Cgbre2Δ</i>       |
| SDBY1606                       | <i>pdr1Δ::NatMX</i>                                                                            | This study                                      | <i>Cgpdr1Δ</i>       |
| ATCC 200989<br>CgWT            | <i>his3Δ trp1Δ ura3Δ</i>                                                                       | <a href="http://www.atcc.org">www.atcc.org</a>  | CgWT                 |
| SDBY1607                       | <i>his3Δ trp1Δ ura3Δ set1Δ::HphMX</i><br><i>C. glabrata</i> isolate fluconazole<br>susceptible | This study                                      | <i>Cgset1Δ</i>       |
| SM1                            | <i>C. glabrata</i> isolate fluconazole<br>resistant                                            | Magill et al. JCM                               | SM1                  |
| SM3                            | <i>C. glabrata</i> isolate fluconazole<br>resistant                                            | Magill et al. JCM<br>Caudle et al. Euk.<br>Cell | SM3                  |
| <i>SM1pdr1Δ</i>                | <i>pdr1::FRT</i>                                                                               |                                                 | <i>SM1pdr1Δ</i>      |
| SDBY1608                       | <i>set1Δ::HphMX</i>                                                                            | This study                                      | <i>SM1set1Δ</i>      |
| SDBY1609                       | <i>set1Δ::HphMX</i>                                                                            | This study                                      | <i>SM3set1Δ</i>      |
| SDBY1610                       | <i>set1Δ::HphMX pdr1::FRT</i>                                                                  | This study                                      | <i>SM1set1Δpdr1Δ</i> |

| <b>Table S2. Plasmids</b> |                          |                 |               |               |
|---------------------------|--------------------------|-----------------|---------------|---------------|
| <b>Plasmid</b>            | <b>Inserted Gene</b>     | <b>Promoter</b> | <b>Vector</b> | <b>Source</b> |
| pGRB2.0                   | None                     |                 | pGRB2.0       | Zordan et al. |
| pGRB2.0                   | <i>SET1</i>              | <i>SET1</i>     | pGRB2.0       | Zordan et al. |
| pGRB2.0                   | <i>SET1/H1048K</i>       | <i>SET1</i>     | pGRB2.0       | Zordan et al. |
| pGRB2.0                   | <i>3XFLAGSET1</i>        | <i>SET1</i>     | pGRB2.0       | Zordan et al. |
| pGRB2.0                   | <i>3XFLAGSET1/H1048K</i> | <i>SET1</i>     | pGRB2.0       | Zordan et al. |

| <b>Table S3. Primers for qRT-PCR</b> |                          |
|--------------------------------------|--------------------------|
| <b>Primer Name</b>                   | <b>Sequence</b>          |
| <i>CgRDN18-001F</i>                  | ACGGAGCCAGCGAGTCTAAC     |
| <i>CgRDN18-002R</i>                  | CGACGGAGTTTCACAAGATTACC  |
| <i>CgERG3-001F</i>                   | TGGGAGCACCACGGTCTAAG     |
| <i>CgERG3-002R</i>                   | CAGTCGGTGAAGAAGATGAAAGTG |
| <i>CgERG11-001F</i>                  | GGGTCCAAAGGGTCACGAA      |
| <i>CgERG11-002R</i>                  | GCAGCTTCAGCGGAAACATC     |
| <i>CgCDR1-001F</i>                   | GTCTATGGAAGGTGCCGTC      |
| <i>CgCDR1-002R</i>                   | TGAACCAGGTCTACCTAGCACAAC |
| <i>CgPDR1-001F</i>                   | TCGGCGAGGGTAAATTCAAC     |
| <i>CgPDR1-002R</i>                   | CAACTGCGTTTGATTCTTAAGC   |
| <i>CgSET1-001F</i>                   | CCAACCAAAGCCGATACTCATC   |
| <i>CgSET1-002R</i>                   | GCGTTGACTACCGCGAGATT     |
| <i>CgYOR1-001F</i>                   | GTACAGAGTGTGCCGGAACAAG   |
| <i>CgYOR1-002R</i>                   | TGCGTCACCTTCTCTATGTCGTT  |
| <i>CgPDH1-001F</i>                   | GAGTCCGCCGATGTGTCAT      |
| <i>CgPDH1-002R</i>                   | CAGCTTCACGGGCAGGTT       |
| <i>CgSNQ2-001F</i>                   | CCCCGGCGGATAAACTAAC      |
| <i>CgSNQ2-002R</i>                   | CTGGCTCGCAGTGTCTCTTG     |
| <i>ScRDN18-001F</i>                  | TGGTGCATGGCCGTTCTTA      |
| <i>ScRDN18-002R</i>                  | GGTCTCGTTTCGTTATCGCAATT  |
| <i>ScERG11-001F</i>                  | CTACCTACAAGGATGGTGTGAAG  |
| <i>ScERG11-002R</i>                  | CAGAAGTGGCAGCAGAAGTAT    |
| <i>ScPDR5-001F</i>                   | ATTCACCAACCCTCTGCTATTT   |
| <i>ScPDR5-002R</i>                   | TTACAACCTTCGCCCAAGTC     |
| <i>ScPDR1-001F</i>                   | CGGGCACTTCATGCTTACTA     |
| <i>ScPDR1-002R</i>                   | CTCCGGTAGTGAGTTGTTTCTC   |

| <b>Table S4. Probe sets for ChIP Analysis</b> |                                                                                                          |
|-----------------------------------------------|----------------------------------------------------------------------------------------------------------|
| <b>Probe Name</b>                             | <b>Sequence 5'-3'</b>                                                                                    |
| <i>ERG11 Promoter</i>                         | /56-FAM/CCTTGTTCC/ZEN/AACTACAATCGAGTGAGCT/3IABkFQ/<br>CGAATACGAGGCCATTTGTAAAC<br>CTGTGCTCCCATCTCACTATAAC |
| <i>ERG11 5'</i>                               | /56-FAM/TCGTACTTC/ZEN/CAAGCTCTGCCATTGG/3IABkFQ/<br>GAGTACGTGAAGCTTGGTCTT                                 |

TGGCAAGGCGACCATAATAG  
 ERG11 3' /56-FAM/CGGCATGAC/ZEN/TTAAGCTGGTTGTTTCG/3IABkFQ/  
 ACGGGATATACGCTGATTCATT  
 AGCAGCAAAGCCCTCTAAA  
 ERG3 Promoter /56-FAM/AGCGAGAGC/ZEN/TGCTAGAGCTGAGAA/3IABkFQ/  
 GAGACTATACGAGTGTGCTCTTTG  
 TCTTCTTCCAGGCCTCATCT  
 ERG3 5' /56-FAM/TCGACGACT/ZEN/CGTTGGTCAATGCTT/3IABkFQ/  
 CGACGATGTGTATGCCAAGA  
 ATGCAGCAGCGTAGAGTTAG  
 ERG3 3' /56-FAM/CCAAGAGGT/ZEN/GGAAGGTGACGACAC/3IABkFQ/  
 AGAAACCGCCGCTTACAT  
 CCGGTGTTTCTGTCTAGTT

**Table S5.**

**qRT-PCR Values**

**Figure 4A: qRT-PCR**

| Gene          | Strain  | Condition       | Mean RQ | St Dev | N | P-Value |
|---------------|---------|-----------------|---------|--------|---|---------|
| <i>ScPDR5</i> | ScWT    | Untreated       | 1.027   | 0.28   | 4 | n.s.    |
| <i>ScPDR5</i> | ScWT    | (+) fluconazole | 1.16    | 0.30   | 4 | n.s.    |
| <i>ScPDR5</i> | Scset1Δ | Untreated       | 0.45    | 0.08   | 4 | <0.01   |
| <i>ScPDR5</i> | Scset1Δ | (+) fluconazole | 0.515   | 0.17   | 4 | <0.01   |

**Figure 4B: qRT-PCR**

| Gene          | Strain  | Condition       | Mean RQ | St Dev | N | P-Value |
|---------------|---------|-----------------|---------|--------|---|---------|
| <i>ScPDR1</i> | ScWT    | Untreated       | 1.13    | 0.58   | 3 | n.s.    |
| <i>ScPDR1</i> | ScWT    | (+) fluconazole | 1.39    | 0.1    | 3 | n.s.    |
| <i>ScPDR1</i> | Scset1Δ | Untreated       | 1.17    | 0.57   | 3 | n.s.    |
| <i>ScPDR1</i> | Scset1Δ | (+) fluconazole | 1.73    | 0.37   | 3 | n.s.    |

**Figure 4D: qRT-PCR**

| Gene          | Strain  | Condition       | Mean RQ | St Dev | N | P-Value |
|---------------|---------|-----------------|---------|--------|---|---------|
| <i>CgCDR1</i> | CgWT    | Untreated       | 1       | 0.75   | 7 | n.s.    |
| <i>CgCDR1</i> | CgWT    | (+) fluconazole | 4.51    | 1.07   | 7 | n.s.    |
| <i>CgCDR1</i> | Cgset1Δ | Untreated       | 1.1     | 0.97   | 7 | n.s.    |
| <i>CgCDR1</i> | Cgset1Δ | (+) fluconazole | 4.04    | 0.61   | 7 | n.s.    |

**Figure 4E: qRT-PCR**

| Gene          | Strain  | Condition       | Mean RQ | St Dev | N | P-Value |
|---------------|---------|-----------------|---------|--------|---|---------|
| <i>CgPDR1</i> | CgWT    | Untreated       | 1       | 0.26   | 3 | n.s.    |
| <i>CgPDR1</i> | CgWT    | (+) fluconazole | 2.29    | 0.20   | 3 | n.s.    |
| <i>CgPDR1</i> | Cgset1Δ | Untreated       | 1.02    | 0.35   | 3 | n.s.    |
| <i>CgPDR1</i> | Cgset1Δ | (+) fluconazole | 2.29    | 0.25   | 3 | n.s.    |

**Figure 5E: qRT-PCR**

| Gene           | Strain  | Condition       | Mean RQ | St Dev | N | P-Value |
|----------------|---------|-----------------|---------|--------|---|---------|
| <i>CgERG11</i> | CgWT    | Untreated       | 1       | 0.32   | 3 | n.s.    |
| <i>CgERG11</i> | CgWT    | (+) fluconazole | 10.29   | 0.23   | 3 | n.s.    |
| <i>CgERG11</i> | Cgset1Δ | Untreated       | 1.32    | 0.65   | 3 | n.s.    |
| <i>CgERG11</i> | Cgset1Δ | (+) fluconazole | 3.83    | 0.26   | 3 | <0.0001 |

**Figure 5F: qRT-PCR**



| Gene          | Strain         | Condition       | Mean RQ | St Dev |   | P-Value |
|---------------|----------------|-----------------|---------|--------|---|---------|
| <i>CgERG3</i> | CgWT           | Untreated       | 1       | 0.1    | 3 | n.s.    |
| <i>CgERG3</i> | CgWT           | (+) fluconazole | 3.63    | 0.69   | 3 | n.s.    |
| <i>CgERG3</i> | <i>Cgset1Δ</i> | Untreated       | 1.14    | 0.05   | 3 | n.s.    |
| <i>CgERG3</i> | <i>Cgset1Δ</i> | (+) fluconazole | 0.9     | 0.18   | 3 | <0.0001 |

**Figure 5G: qRT-PCR**

| Gene           | Strain         | Condition       | Mean RQ | St Dev |   | P-Value |
|----------------|----------------|-----------------|---------|--------|---|---------|
| <i>ScERG11</i> | ScWT           | Untreated       | 1.022   | 0.12   | 4 | n.s.    |
| <i>ScERG11</i> | ScWT           | (+) fluconazole | 3.649   | 0.85   | 4 | n.s.    |
| <i>ScERG11</i> | <i>Scset1Δ</i> | Untreated       | 0.696   | 0.11   | 4 | <0.001  |
| <i>ScERG11</i> | <i>Scset1Δ</i> | (+) fluconazole | 3.151   | 1.17   | 4 | n.s.    |

**Figure 6A: ChIP qRT-PCR**

| Gene           | Strain        | Condition       | Mean RQ | St Dev |   | P-Value |
|----------------|---------------|-----------------|---------|--------|---|---------|
| <i>CgERG11</i> | CgWT promoter | Untreated       | 11.24   | 5.57   | 3 | n.s.    |
| <i>CgERG11</i> | CgWT promoter | (+) fluconazole | 22.138  | 12.01  | 3 | n.s.    |
| <i>CgERG11</i> | CgWT 5'       | Untreated       | 62.531  | 1.45   | 3 | n.s.    |
| <i>CgERG11</i> | CgWT 5'       | (+) fluconazole | 133.274 | 20.39  | 3 | <0.001  |
| <i>CgERG11</i> | CgWT 3'       | Untreated       | 11.412  | 3.19   | 3 | n.s.    |
| <i>CgERG11</i> | CgWT 3'       | (+) fluconazole | 26.019  | 7.85   | 3 | <0.05   |

**Figure 6B: ChIP qRT-PCR**

| Gene          | Strain  | Condition       | Mean RQ | St Dev |   | P-Value |
|---------------|---------|-----------------|---------|--------|---|---------|
| <i>CgERG3</i> | CgWT    | Untreated       | 35.768  | 18.27  | 3 | n.s.    |
| <i>CgERG3</i> | CgWT    | (+) fluconazole | 57.996  | 35.32  | 3 | n.s.    |
| <i>CgERG3</i> | CgWT 5' | Untreated       | 145.877 | 42.57  | 3 | n.s.    |
| <i>CgERG3</i> | CgWT 5' | (+) fluconazole | 281.392 | 69.12  | 3 | <0.05   |
| <i>CgERG3</i> | CgWT 3' | Untreated       | 50.262  | 13.74  | 3 | n.s.    |
| <i>CgERG3</i> | CgWT 3' | (+) fluconazole | 133.95  | 59.06  | 3 | n.s.    |

**Figure 6C: qRT-PCR**

| Gene           | Strain                | Condition       | Mean RQ | St Dev |   | P-Value |
|----------------|-----------------------|-----------------|---------|--------|---|---------|
| <i>CgERG11</i> | CgWT+V                | Untreated       | 0.951   | 0.38   | 4 | n.s.    |
| <i>CgERG11</i> | CgWT+V                | (+) fluconazole | 6.791   | 1.99   | 4 | n.s.    |
| <i>CgERG11</i> | <i>Cgset1Δ</i> +V     | Untreated       | 1.342   | 0.55   | 4 | n.s.    |
| <i>CgERG11</i> | <i>Cgset1Δ</i> +V     | (+) fluconazole | 2.603   | 1.04   | 4 | <0.01   |
| <i>CgERG11</i> | <i>Cgset1Δ/SET1</i>   | Untreated       | 1.227   | 0.63   | 4 | n.s.    |
| <i>CgERG11</i> | <i>Cgset1Δ/SET1</i>   | (+) fluconazole | 6.438   | 2.78   | 4 | n.s.    |
| <i>CgERG11</i> | <i>Cgset1Δ/H1048K</i> | Untreated       | 1.346   | 0.43   | 4 | n.s.    |
| <i>CgERG11</i> | <i>Cgset1Δ/H1048K</i> | (+) fluconazole | 3.370   | 0.87   | 4 | <0.05   |

**Figure 6D: qRT-PCR**

| Gene          | Strain                | Condition       | Mean RQ | Standard Deviation |   | P-Value |
|---------------|-----------------------|-----------------|---------|--------------------|---|---------|
| <i>CgERG3</i> | CgWT+V                | Untreated       | 1.266   | 1.14               | 4 | n.s.    |
| <i>CgERG3</i> | CgWT+V                | (+) fluconazole | 5.686   | 2.14               | 4 | n.s.    |
| <i>CgERG3</i> | <i>Cgset1Δ</i> +V     | Untreated       | 0.814   | 0.35               | 4 | n.s.    |
| <i>CgERG3</i> | <i>Cgset1Δ</i> +V     | (+) fluconazole | 1.512   | 0.43               | 4 | n.s.    |
| <i>CgERG3</i> | <i>Cgset1Δ/SET1</i>   | Untreated       | 1.034   | 0.64               | 4 | n.s.    |
| <i>CgERG3</i> | <i>Cgset1Δ/SET1</i>   | (+) fluconazole | 7.518   | 4.23               | 4 | <0.001  |
| <i>CgERG3</i> | <i>Cgset1Δ/H1048K</i> | Untreated       | 0.888   | 0.21               | 4 | n.s.    |

|               |                       |                 |       |      |   |       |
|---------------|-----------------------|-----------------|-------|------|---|-------|
| <i>CgERG3</i> | <i>Cgset1Δ/H1048K</i> | (+) fluconazole | 2.357 | 0.54 | 4 | <0.05 |
|---------------|-----------------------|-----------------|-------|------|---|-------|

**Figure 8E: qRT-PCR**

| Gene           | Strain             | Condition       | Mean RQ | St Dev |   | P-Value |
|----------------|--------------------|-----------------|---------|--------|---|---------|
| <i>CgERG11</i> | SM1 <i>CgWT</i>    | Untreated       | 1.15    | 0.72   | 3 | n.s.    |
| <i>CgERG11</i> | SM1 <i>CgWT</i>    | (+) fluconazole | 19.69   | 6.49   | 3 | n.s.    |
| <i>CgERG11</i> | SM1 <i>Cgset1Δ</i> | Untreated       | 1.04    | 0.89   | 3 | n.s.    |
| <i>CgERG11</i> | SM1 <i>Cgset1Δ</i> | (+) fluconazole | 6.3     | 3.80   | 3 | <0.05   |

**Figure 8F: qRT-PCR**

| Gene           | Strain             | Condition       | Mean RQ | St Dev |   | P-Value |
|----------------|--------------------|-----------------|---------|--------|---|---------|
| <i>CgERG11</i> | SM3 <i>CgWT</i>    | Untreated       | 1.51    | 1.66   | 5 | n.s.    |
| <i>CgERG11</i> | SM3 <i>CgWT</i>    | (+) fluconazole | 6.15    | 1.63   | 5 | n.s.    |
| <i>CgERG11</i> | SM3 <i>Cgset1Δ</i> | Untreated       | 1.54    | 0.76   | 5 | n.s.    |
| <i>CgERG11</i> | SM3 <i>Cgset1Δ</i> | (+) fluconazole | 2.87    | 0.42   | 5 | <0.01   |
